# Supplementary material for: A novel system integrating electrolysis and ionic membranes (EIMs) enables artificial carbon concentration and alleviation of metal cation stress in microalgae cultivation
Source: Royal Society of Chemistry journal article supplement (doi:10.1039/d3gc01656k), 2023-01-01
Supplement: d3gc01656k1.pdf [file d3gc01656k1.pdf]

A Novel System Integrating Electrolysis and Ionic Membranes (EIMs) Enables  
the Artificial Carbon Concentration and Alleviation of Metal Cation Stress in  
Microalgae Cultivation

Yuyong Hou<sup>1,2,#</sup>, Tong Han<sup>1,3,#</sup>, Ranran Wu<sup>1,2</sup>, Zhiyong Liu<sup>1,2</sup>, Yanbo Ma<sup>1,4</sup>,  
Zhile Guo<sup>1,4</sup>, Nahui Hao<sup>1</sup>, Weijie Wang<sup>4</sup>, Xiang Ji<sup>5</sup>, Zhiguang Zhu<sup>1,2</sup>, Fangjian  
Chen<sup>1,2,\*</sup>, Lei Zhao<sup>1,2,6,\*</sup>

<sup>1</sup> Key Laboratory of Engineering Biology for Low-carbon Manufacturing,  
Tianjin Institute of Industrial Biotechnology, Chinese Academy of Sciences,  
Tianjin, China

<sup>2</sup> National Center of Technology Innovation for Synthetic Biology, Tianjin,  
China

<sup>3</sup> University of Chinese Academy of Sciences, Beijing, China

<sup>4</sup> College of Life Science, North China University of Science and Technology,  
Tangshan, China

<sup>5</sup> College of Grassland, Resources and Environment, Inner Mongolia  
Agricultural University, Hohhot, China

<sup>6</sup> Sino-Danish College, University of Chinese Academy of Sciences, Beijing,  
China

# These authors contributed equally to this paper.

\* Correspondence:

Lei Zhao and Fangjian Chen

Key Laboratory of Engineering Biology for Low-carbon Manufacturing,  
Tianjin Institute of Industrial Biotechnology, Chinese Academy of Sciences  
32 West 7th Avenue, Tianjin Airport Economic Area, Tianjin 300308, China

Email: zhaol@tib.cas.cn; chen\_fj@tib.cas.cn

## Figure S1-S6

**Figure S1.** Assembly diagram of the anode and cathode chambers in EIMs.

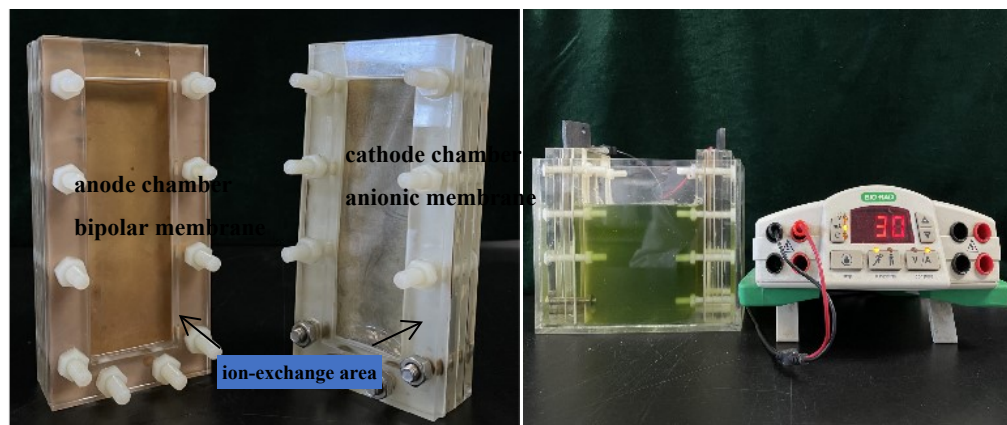

The EIMs consisted of two parallel cuboids, the anode and cathode chambers. Each independent chamber (cathode and anode) was assembled with acrylic plates and soft silicone pads with a size of 6.5 (length)  $\times$  3 (width)  $\times$  14 (height) cm and an ion-exchange area of 35 cm<sup>2</sup>.

**Figure S2.** The electrode potentials of EIMs added with sea-water or fresh water BG11 medium.

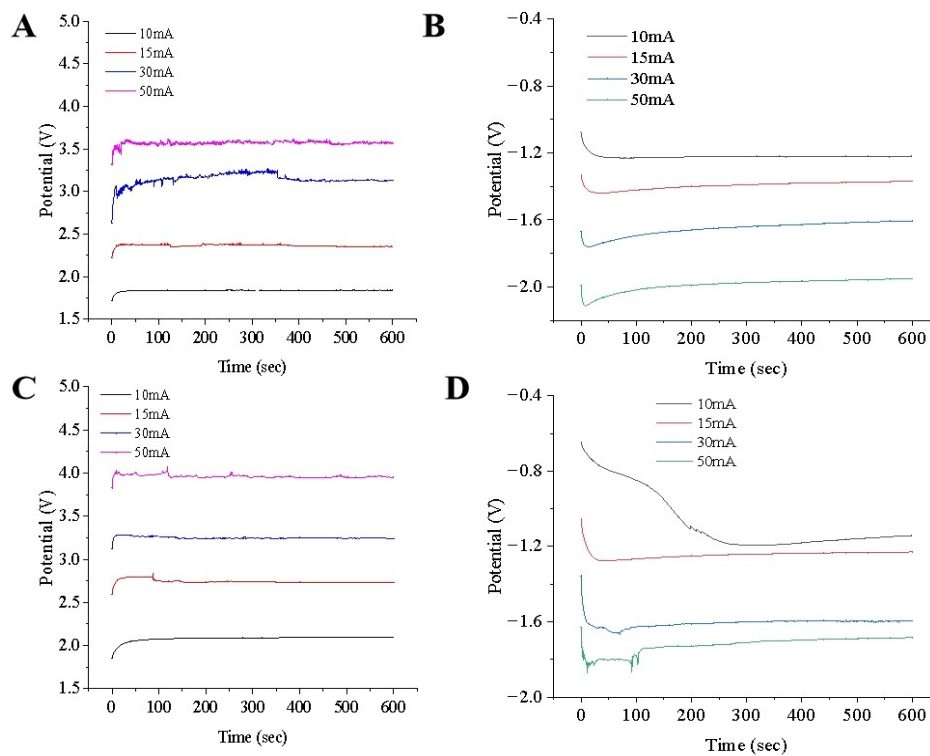

The detected electrode potentials of EIMs when either sea-water or fresh water BG11 medium was used in the system. The electrode potentials were measured by a CHI660E electrochemical workstation at room temperature with an integrated three-electrode system within Ag/AgCl reference electrode. A, anode potential of EIMs when sea-water BG11 medium was used; B, cathode potential of EIMs when sea-water BG11 medium was used; C, anode potential of EIMs when fresh water BG11 medium was used; D, cathode potential of EIMs when fresh water BG11 medium was used.

**Figure S3.** Overall system boundary for biomass production from microalgae cultivation with EIM and traditional culture systems.

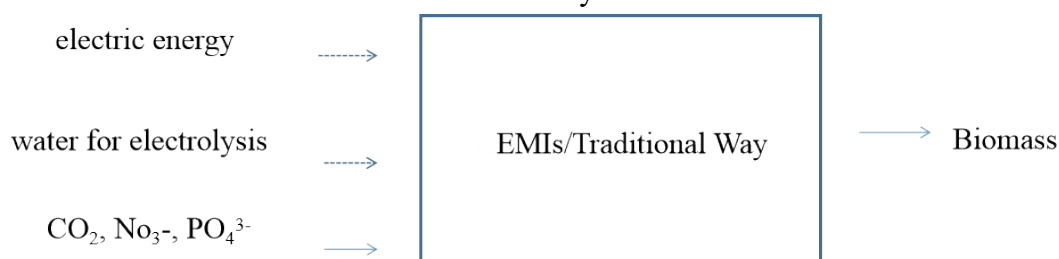

Life cycle assessment (LCA) is a quantitative method for the environmental impacts and emission reduction potential from the input to the end life of the product. It was previously reported that CO<sub>2</sub> fixation by microalgae benefits the alleviation of global warming [1]. Here we used LCA to compare the microalgae cultivation by traditional methods or EIMs system with the developed Simapro software (<https://simapro.com/>).

**Figure S4.** Evaluation of the CO<sub>2</sub> Fixation in the waste catholyte

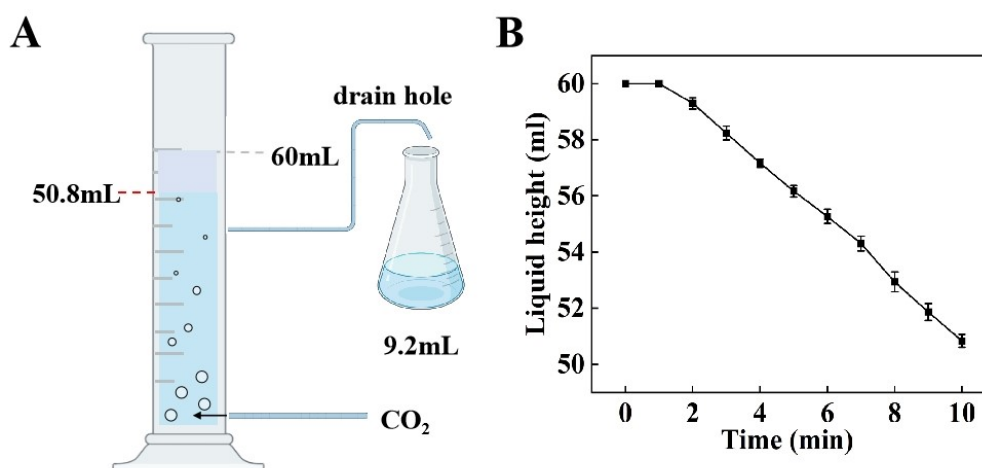

Sixty milliliters of waste catholyte was transferred into a 100 mL closed measuring cylinder with a drain hole at the end of the cultivation, and CO<sub>2</sub> with 20 mL/min was aerated at the bottom of the cylinder (Fig S2A). The changes in volume were measured and are shown in Fig S2B. The CO<sub>2</sub> fixation efficiency (CO<sub>2</sub> FE) was calculated as  $(200-V)/200 \times 100\%$ . All results were repeated three times, and the results are expressed as the means  $\pm$  standard errors of the means based on parallel experiments.

**Figure S5.** Visual comparison of three groups with *Chlamydomonas* strain CC-125 at days 0 and 8.

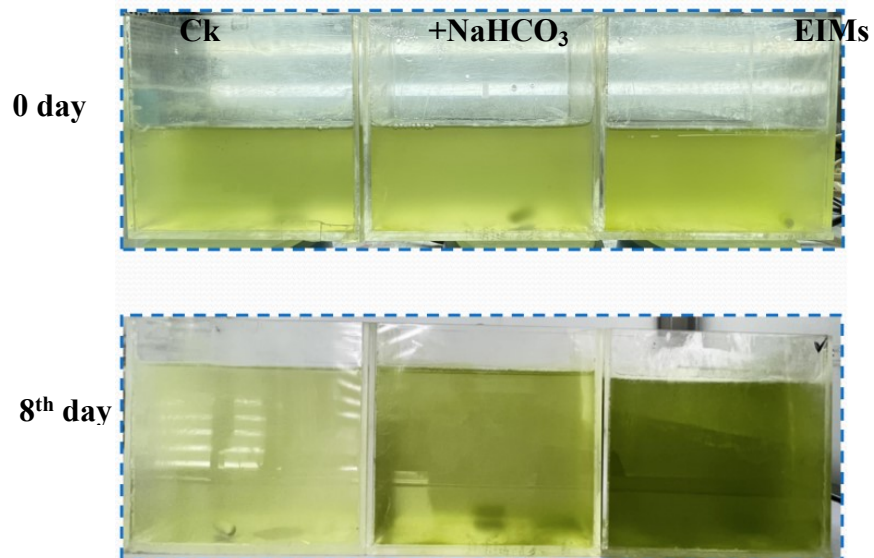

*Chlamydomonas* CC-125 cells were cultured to logarithmic growth phase and transferred to the microalgae pond with fresh BG11 medium. Photographs were taken on the initial day and on 8<sup>th</sup> day. The experiment was repeated at least three times, and similar results were obtained.

**Figure S6.** Visual comparison of three groups of *Chlorella* FA-9 at days 0, 7 and 28.

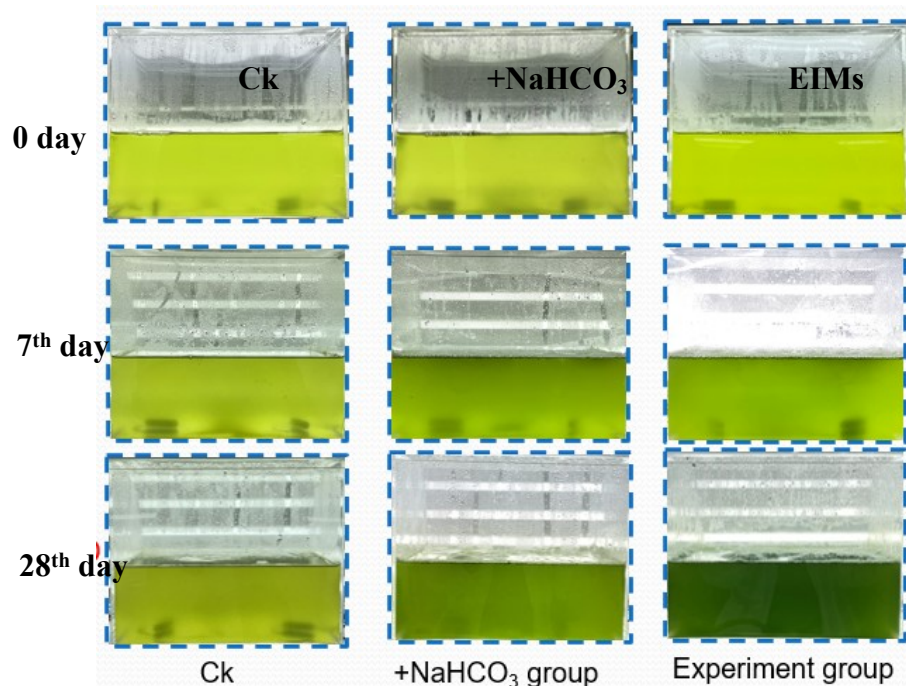

*Chlorella* FA-9 cells were cultured to logarithmic growth phase and transferred to the microalgae pond with fresh BG11 medium. Photographs were taken on the initial day and on the 7<sup>th</sup> and 28<sup>th</sup> days. The experiment was repeated at least three times, and similar results were obtained.

**Figure S7.** Assembly amplification diagram of the anode and cathode chamber in EIMs.

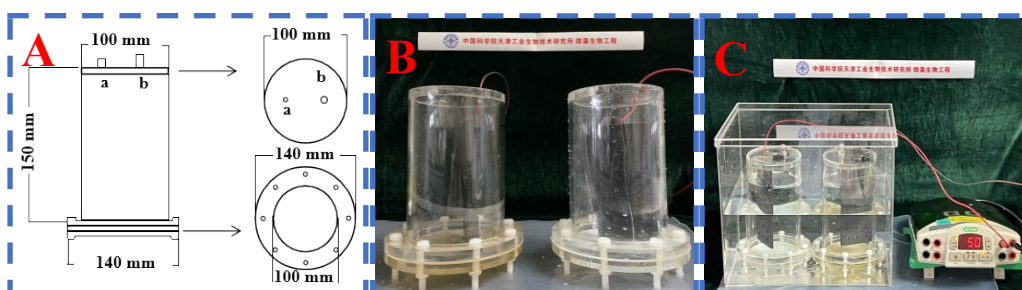

The electrolyte in the cathode and anode chambers easily spilled out, which might inhibit microalgae growth, as the two chambers are open. On the other hand, the small volume of electrolyte (60 mL) and area of ion exchange (35 cm<sup>2</sup>) limited the scale-up application. Thus, a cylindrical chamber (cathode and anode) with a volume of 1000 mL and cover sealing are designed as shown in Fig. S5, where “a” and “b” represent the holes for electrical line and electrolytic gas production, respectively. As a result, carbon resources in the 1000 mL system increased 15.7-fold compared with those in the 60 mL system. To verify the potential application of EIMs in scaled and commercial production, 150 L open raceway pond microalgae cultivation was carried out. The seeds were cultured as described in the “Strains and Cultural Conditions” section, and then the cells were transferred to the racepond under  $100 \pm 10 \mu\text{mol m}^{-2} \text{s}^{-1}$  continuous artificial illumination at room temperature (24-26 °C) with an initial pH of  $7.4 \pm 0.2$ . The initial OD<sub>680</sub> was adjusted to 0.1-0.2 with fresh BG11 medium. For EIM cultivation, the two chambers were placed in the medium, and the

system was operated at days 4, 5, 6, 7, 9 and 13 at 120, 30, 30, 30, and 30 min and 300 mA, respectively.

**Figure S8.** Visual comparison of *Chlamydomonas* in the NaHCO<sub>3</sub> and EIM groups

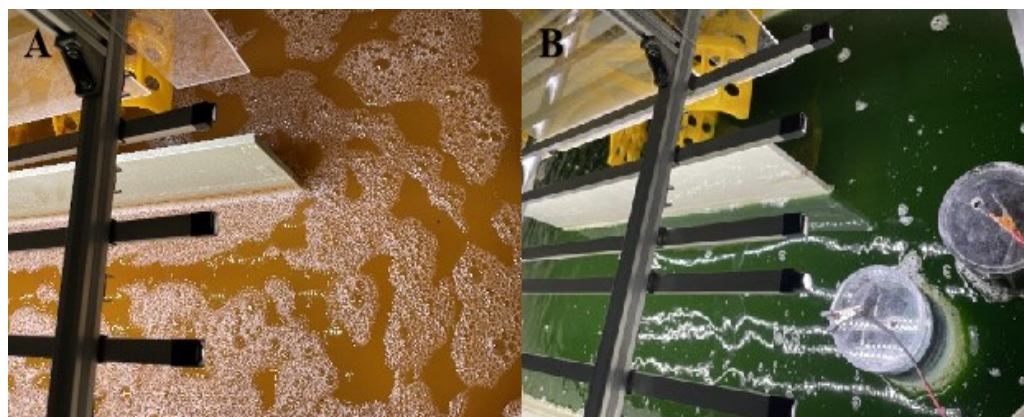

A, Cell growth in the NaHCO<sub>3</sub> group at day 21; B, Cell growth in the EIM group at day 21.

**Figure S9.** Chlorophyll (A), protein and lipid contents (B) of *Chlamydomonas* CC125

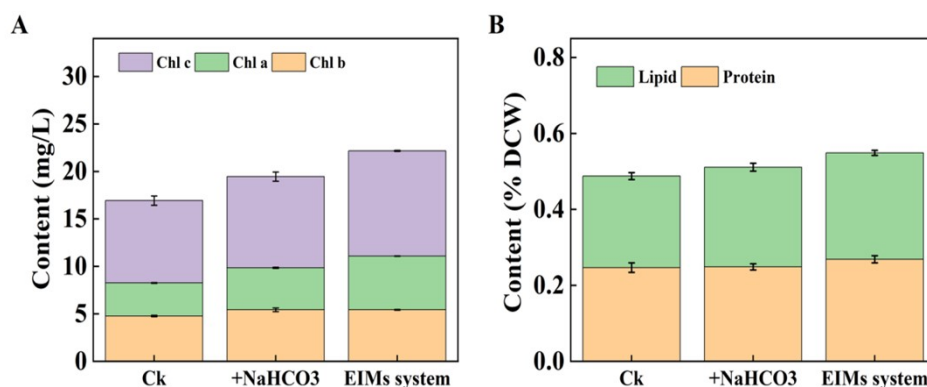

The cell precipitates were harvested at 8000 rpm for 10 min for further study. For protein analysis, the precipitates were boiled for 10 min with 0.5 M NaOH solution, the supernatant was measured using a Bradford assay. For chlorophyll detection, ice-cold 80% acetone/ethanol (v/v) was added and incubated at 4 °C overnight. For lipid content analysis, the precipitates were freeze-dried, and then approximately 40 mg of the biomass was mixed and vortexed with 6 mL chloroform-methanol (2:1, v/v). Subsequently, 2 mL methanol was added. The supernatant was obtained at 12000 rpm for 10 min and then mixed with 3.6 ml of 5% NaCl. The organic phase was then collected and transferred to a preweighed tube at 5000 rpm for 10 min and dried at 60 °C using nitrogen protection. The lipid content was calculated using the difference between the final and initial weights of the tubes. All results

were repeated three times, and the results are expressed as the means  $\pm$  standard errors of the means based on parallel experiments.

## Table

**Table S1** Summary of environmental input and output for EIM and traditional culture systems.

| Parameter                        | Unit | EIMs        | Traditioanal Way |
|----------------------------------|------|-------------|------------------|
| Input                            |      |             |                  |
| Electric energy                  | kWh  | 0.000422225 | -                |
| H <sub>2</sub> O                 | g    | 0.096       | -                |
| CO <sub>2</sub>                  | kg   | 1.83        | 18.3             |
| NaNO <sub>3</sub>                | g    | 400.1       | 400.1            |
| Na <sub>2</sub> HPO <sub>4</sub> | g    | 60.3        | 60.3             |
| Output                           |      |             |                  |
| Microalgae biomass               | kg   | 1           | 1                |
| hydrogen                         | g    | 0.2051      | -                |
| oxygen                           | g    | 0.0256      | -                |

Based on the typical molecular formula of microalgal biomass, CO<sub>0.48</sub>H<sub>1.83</sub>N<sub>0.11</sub>P<sub>0.01</sub>, the inputs of CO<sub>2</sub>, NaNO<sub>3</sub> and Na<sub>2</sub>HPO<sub>4</sub> are 1.83 kg, 400.1 g 60.3 g when one kg of microalgal biomass is generated, respectively. In EIMs, the supplied carbon resource was continuously replenished by CO<sub>2</sub> from air with the increased pH in catholyte. Total inorganic carbon supplied for microalgae fixation is 47.8 g/L per hour when an 800 mL system was used under the continuous current conditions of 10 mA. Therefore, it takes 13.04 hours to transport equal amount of carbon for microalgal capture in EIMs system. The potential difference between anode and cathode is about 3.237 V in EIM system with continuous current conditions of 10 mA. The input electric energy is calculated as  $W=UIT=0.000422225$  kWh, whereas U represents potential difference (V), I represents electric current (A), T represents time (hour). Based on the standard Gibbs free energy of H<sub>2</sub>O (-237.2 kJ/mol), 1 KWh of electricity could be used for the electrolyzation of 0.2267 kg of water, resulting in the production of 0.2051 kg of oxygen and 0.0216 kg of hydrogen according to the law of conservation of energy. Thus, 0.2051 g of hydrogen and 0.0256 g of oxygen is prduced in EIMs system with 0.096 g of water. In traditional production system, CO<sub>2</sub> is directly injected into the culture medium and more than 90% of the injected CO<sub>2</sub> is escaped into the atmosphere again. Therefore 18.3kg CO<sub>2</sub> was used when the same microalgal biomass is produced.

**Table S2** Life cycle assessment per impact categories for 1 kg microalgal biomass produced by EIM and traditional culture systems.

| impact category         | Unit                      | EIMs     | Traditional Way |
|-------------------------|---------------------------|----------|-----------------|
| carcinogens             | Kg C2H3Cl eq              | 0.0263   | 0.0295          |
| Non-carcinogens         | Kg C2H3Cl eq              | 0.033    | 0.0369          |
| Respiratory inorganics  | Kg PM2.5 eq               | 0.00139  | 0.00173         |
| Ionizing radiation      | B1 C-14 eq                | -8.2     | 10.1            |
| Ozone layer depletion   | Kg CFC-11 eq              | 5.77E-8  | 1.16E-7         |
| Respiratory organics    | Kg C2H4 eq                | 0.000158 | 0.000266        |
| Aquatic ecotoxicity     | Kg TEG water              | 134      | 158             |
| terrestrial ecotoxicity | Kg TEG soil               | 30.4     | 36.2            |
| terrestrial acid/nutri  | Kg SO2 eq                 | 0.0344   | 0.0406          |
| land occupation         | m <sup>2</sup> org.arable | 0.0264   | 0.0322          |
| Aquatic acidification   | Kg SO2 eq                 | 0.00703  | 0.00891         |
| Aquatic eutrophication  | Kg PO4 p-lim              | 0.000399 | 0.00891         |
| Global warming          | Kg CO2 eq                 | 1.29     | 18.1            |
| Non-renewable energy    | MJ primary                | 6.59     | 18.1            |
| Mineral extraction      | MJ surplus                | 0.17     | 0.175           |

**Table S3** Fatty acid compositions of the total lipid extract from *C. reinhardtii* cultures in different groups at 150 L

| FAs   | Relative content of total FAs (% w/w) |                     |             |
|-------|---------------------------------------|---------------------|-------------|
|       | Control                               | +NaHCO <sub>3</sub> | EIMs system |
| C14:0 | 1.5±0.39                              | 1.7±0.22            | 1.6±0.13    |
| C16:0 | 29.4±0.19                             | 27.8±0.42           | 28.8±0.51   |
| C16:1 | 1.2±0.23                              | 1.2±0.10            | 1.3±0.29    |
| C16:2 | 2.7±0.16                              | 2.6±0.35            | 2.7±0.11    |
| C16:3 | 1.9±0.49                              | 1.9±0.61            | 1.8±0.55    |
| C18:0 | 10.4±0.39                             | 10.2±0.12           | 10.7±0.11   |



|            |           |           |           |
|------------|-----------|-----------|-----------|
| C18:1      | 15.9±0.59 | 16.7±0.33 | 16.6±0.52 |
| C18:2      | 10.3±0.39 | 11.2±0.17 | 10.8±0.13 |
| C18:3      | 21.7±0.26 | 25.3±0.45 | 22.3±0.51 |
| Total SFA  | 41.3      | 39.7      | 41.1      |
| Total MUFA | 17.1      | 17.9      | 17.9      |
| Total PUFA | 36.6      | 41.0      | 37.6      |
| Others     | 5.0       | 1.4       | 3.4       |
| Total      | 100       | 100       | 100       |

---

SFA represents saturated fatty acids; MUFA represents monounsaturated fatty acids; PUFA represents polyunsaturated fatty acids.

### Reference

1. Teresa M. Mata, Madalena Cameira, Francisca Marques, Edgar Santos, Sara Badenes, Luís Costa, Vitor Verdelho Vieira, Nídia S. Caetano, António A. Martins, Carbon footprint of microalgae production in photobioreactor, *Energy Procedia*, Volume 153, 2018, Pages 432-437)
2. Yannan Dong, Shaohua Ma, Zijiao Han, Jintong Bai, Qiwei Wang, Research on the adaptability of proton exchange membrane electrolysis in green hydrogen–electric coupling system under multi-operating conditions, *Energy Reports*, Volume 9, 2023, Pages 4789-4798)
